# Supplementary material
Source: Royal Society of Chemistry journal article supplement (doi:10.1039/d6nj01147k)

## Supporting Information

Table S1. Structural, binding, charge-transfer and conceptual DFT parameters for all nine Au<sub>10</sub>-L-DOPA complexes (zwitterionic, aqueous phase).

*Isomer codes: PEH = planar elongated hexagon, CTP = capped trigonal prism, FF = folded flake.*

| System                           | Isomer | d(Au-Au) <sub>avg</sub><br>(Å) | d(Au-O) <sub>min</sub><br>(Å) | ΔG <sub>bind</sub><br>(kcal mol <sup>-1</sup> ) | Δe <sup>-</sup><br>(e) <sup>a</sup> | ΔN <sup>b</sup> |
|----------------------------------|--------|--------------------------------|-------------------------------|-------------------------------------------------|-------------------------------------|-----------------|
| Au <sub>10</sub> <sup>+</sup> -L | PEH    | 2.748                          | 2.188                         | -31.8                                           | +0.529                              | 0.927           |
|                                  | CTP    | 2.763                          | 2.206                         | -24.5                                           | +0.580                              | 0.818           |
|                                  | FF     | 2.752                          | 2.179                         | -22.2                                           | +0.485                              | 0.550           |
| Au <sub>10</sub> <sup>0</sup> -L | PEH    | 2.782                          | 2.307                         | -14.7                                           | +0.317                              | 0.215           |
|                                  | CTP    | 2.769                          | 2.312                         | -22.9                                           | +0.315                              | 0.215           |
|                                  | FF     | 2.749                          | 2.186                         | -17.3                                           | +0.244                              | 0.215           |
| Au <sub>10</sub> <sup>-</sup> -L | PEH    | 2.771                          | 2.364                         | -9.8                                            | +0.223                              | 0.296           |
|                                  | CTP    | 2.790                          | 2.235                         | -2.6                                            | +0.233                              | 0.309           |
|                                  | FF     | 2.770                          | 2.207                         | -8.6                                            | +0.073                              | 0.322           |

<sup>a</sup> Hirshfeld charge transfer; positive values indicate net ligand-to-metal electron transfer.

<sup>b</sup> Conceptual DFT charge transfer (ΔN) based on isolated fragment properties; positive values indicate donor→acceptor flow. For cations and neutrals the flow is L→Au; for anions it is Au→L.

All values correspond to fully optimized geometries at the B3LYP-D3/def2-TZVP level with SMD water. Binding free energies are reported to one decimal place; bond lengths and Δe<sup>-</sup> are given to three decimal places as originally calculated.

**Figure S1.** Optimised structures of all nine  $\text{Au}_{10}$ -L-DOPA complexes (zwitterionic, aqueous phase).

The figure is arranged as a  $3 \times 3$  grid: rows correspond to charge states (+1, 0, -1 from top to bottom), columns correspond to isomer types (PEH, CTP, FF from left to right). Colour code: Au (gold), O (red), N (blue), C (grey), H (white). All structures were optimised at the B3LYP-D3/def2-TZVP level with SMD water.

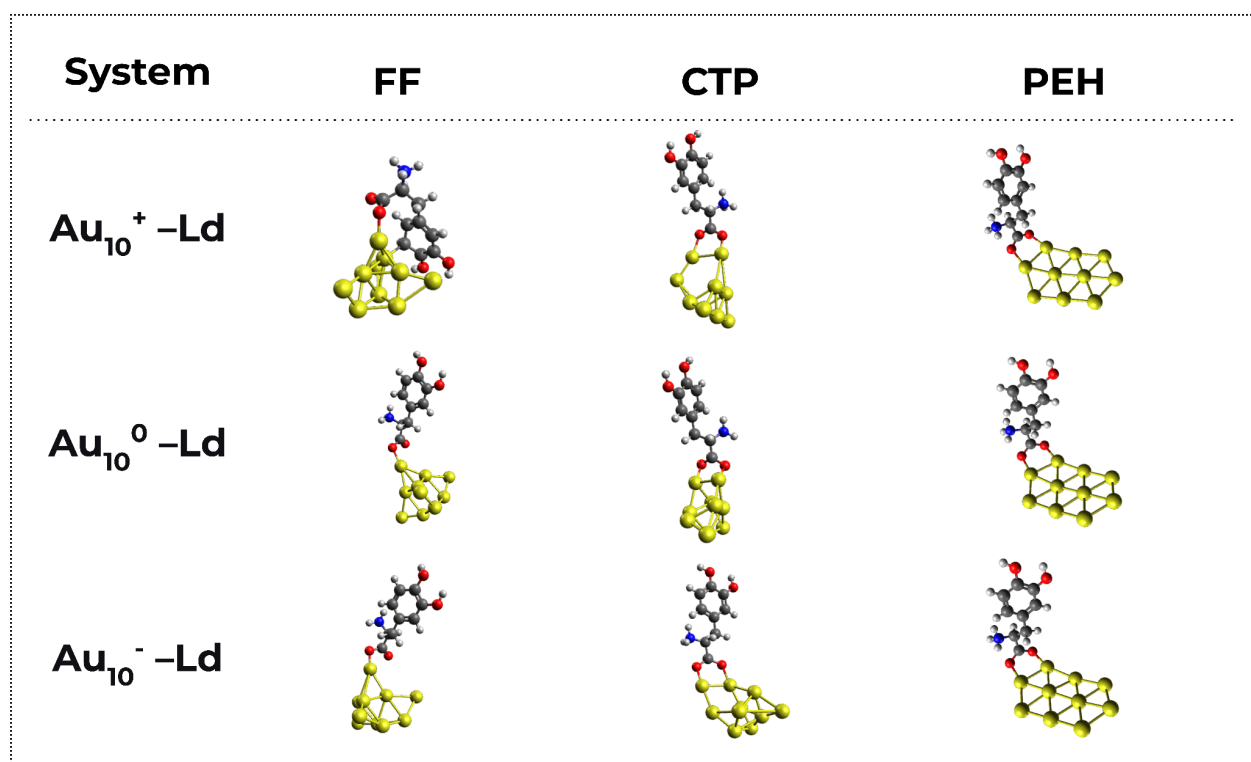

Supplement: d6nj01147k2.pdf [file d6nj01147k2.pdf]
