# Supplementary material
Source: Royal Society of Chemistry journal article supplement (doi:10.1039/d6nj01147k)
Supplement: d6nj01147k1.pdf [file d6nj01147k1.pdf]

## Supporting Information

### S1. Cartesian Coordinates of Optimized Structures

All optimized structures are provided in XYZ format (coordinates in Å). Calculations were performed at the B3LYP-D3(BJ)/def2-TZVP level of theory. Aqueous and zwitterionic environments were modeled using the SMD implicit solvation model (water). All stationary points were confirmed as true minima by vibrational analysis.

The files are organized as follows:

| System                               | Neutral-Gas |              |              | Neutral-Aqueous |   |              | Zwitterion-Aqueous |              |   |              |              |              |
|--------------------------------------|-------------|--------------|--------------|-----------------|---|--------------|--------------------|--------------|---|--------------|--------------|--------------|
| <b>Au<sub>2</sub><sup>0</sup>-Ld</b> | 8           | 2.506330000  | -2.085983000 | 0.021633000     | 8 | 2.472294000  | -2.072738000       | 0.661574000  | 8 | 2.752466000  | -1.402642000 | 1.125867000  |
|                                      | 8           | -1.801164000 | -0.467206000 | -1.611884000    | 8 | -1.847983000 | -0.764696000       | -1.301996000 | 8 | -1.421395000 | -0.992542000 | -1.362274000 |
|                                      | 8           | 3.848166000  | -0.020905000 | -1.040899000    | 8 | 3.768579000  | -0.457203000       | -1.099668000 | 8 | 4.058166000  | 0.130713000  | -0.701525000 |
|                                      | 8           | -2.783996000 | -1.569670000 | 0.083386000     | 8 | -2.914891000 | -1.362868000       | 0.582768000  | 8 | -2.507862000 | -1.392133000 | 0.570710000  |
|                                      | 7           | -3.671776000 | 0.902539000  | 0.988762000     | 7 | -3.604746000 | 1.336139000        | 0.908502000  | 7 | -3.634967000 | 1.073268000  | 0.456402000  |
|                                      | 6           | -1.205001000 | 0.784732000  | 1.383164000     | 6 | -1.141731000 | 1.178194000        | 1.223529000  | 6 | -1.235540000 | 1.413729000  | 0.877981000  |
|                                      | 6           | -2.347428000 | 0.771018000  | 0.344453000     | 6 | -2.330531000 | 0.950095000        | 0.264221000  | 6 | -2.266011000 | 0.853425000  | -0.114636000 |
|                                      | 6           | 0.159026000  | 0.611155000  | 0.771156000     | 6 | 0.182471000  | 0.787927000        | 0.626103000  | 6 | 0.182582000  | 1.123604000  | 0.467828000  |
|                                      | 6           | 0.734883000  | -0.656569000 | 0.695600000     | 6 | 0.748942000  | -0.450657000       | 0.925173000  | 6 | 0.843930000  | 0.012910000  | 0.990892000  |
|                                      | 6           | 0.837740000  | 1.696610000  | 0.227771000     | 6 | 0.834695000  | 1.626913000        | -0.274290000 | 6 | 0.836353000  | 1.919147000  | -0.468998000 |
|                                      | 6           | 1.964363000  | -0.841398000 | 0.085072000     | 6 | 1.941500000  | -0.845124000       | 0.340071000  | 6 | 2.131644000  | -0.299555000 | 0.588004000  |
|                                      | 6           | -2.353467000 | -0.553360000 | -0.398594000    | 6 | -2.415654000 | -0.511846000       | -0.120957000 | 6 | -2.045218000 | -0.641623000 | -0.359186000 |
|                                      | 6           | 2.073757000  | 1.520516000  | -0.385359000    | 6 | 2.031954000  | 1.237063000        | -0.864590000 | 6 | 2.130053000  | 1.611431000  | -0.876948000 |
|                                      | 6           | 2.635602000  | 0.258059000  | -0.459879000    | 6 | 2.587991000  | 0.003079000        | -0.562496000 | 6 | 2.780077000  | 0.503761000  | -0.353858000 |
|                                      | 1           | -1.398156000 | -0.007208000 | 2.110278000     | 1 | -1.329922000 | 0.611373000        | 2.137110000  | 1 | -1.435871000 | 0.975579000  | 1.858022000  |
|                                      | 1           | -1.259458000 | 1.739430000  | 1.913221000     | 1 | -1.147673000 | 2.239813000        | 1.477342000  | 1 | -1.400651000 | 2.490592000  | 0.949307000  |
|                                      | 1           | -2.217938000 | 1.583955000  | -0.365909000    | 1 | -2.200712000 | 1.551008000        | -0.631597000 | 1 | -2.225241000 | 1.382872000  | -1.061908000 |
|                                      | 1           | 0.231555000  | -1.521813000 | 1.108479000     | 1 | 0.260652000  | -1.125190000       | 1.617822000  | 1 | 0.356465000  | -0.625941000 | 1.716868000  |
|                                      | 1           | 0.407645000  | 2.688848000  | 0.281326000     | 1 | 0.408089000  | 2.591323000        | -0.519650000 | 1 | 0.336506000  | 2.784850000  | -0.884765000 |
|                                      | 1           | 2.601869000  | 2.369679000  | -0.804430000    | 1 | 2.543957000  | 1.888839000        | -1.562696000 | 1 | 2.644425000  | 2.229455000  | -1.603400000 |
|                                      | 1           | -3.641985000 | 1.619845000  | 1.706468000     | 1 | -3.515887000 | 2.289270000        | 1.253911000  | 1 | -3.764909000 | 2.055370000  | 0.711369000  |
|                                      | 1           | -3.898124000 | 0.018291000  | 1.440627000     | 1 | -3.758797000 | 0.740405000        | 1.720667000  | 1 | -3.756338000 | 0.496443000  | 1.293626000  |
|                                      | 1           | 3.362553000  | -2.024637000 | -0.423096000    | 1 | 3.295777000  | -2.197947000       | 0.167706000  | 1 | 3.642433000  | -1.477488000 | 0.751705000  |
|                                      | 1           | -1.801991000 | -1.355963000 | -2.003945000    | 1 | -1.874193000 | -1.723893000       | -1.470623000 | 1 | 4.417078000  | 0.753436000  | -1.348296000 |

|                                      |    |              |              |              |    |              |              |              |    |              |              |              |
|--------------------------------------|----|--------------|--------------|--------------|----|--------------|--------------|--------------|----|--------------|--------------|--------------|
|                                      | 1  | 4.248355000  | 0.784670000  | -1.384570000 | 1  | 4.127703000  | 0.199862000  | -1.711609000 | 1  | -4.362180000 | 0.815087000  | -0.214648000 |
|                                      | 79 | -7.233643000 | 1.989087000  | -1.934864000 | 79 | -7.448687000 | 1.145446000  | -1.796655000 | 79 | -1.991037000 | -3.464914000 | 0.569145000  |
|                                      | 79 | -5.320157000 | 1.393919000  | -0.364437000 | 79 | -5.351916000 | 1.239452000  | -0.326452000 | 79 | -1.385467000 | -5.945952000 | 0.676298000  |
| <b>Au<sub>2</sub><sup>+</sup>-Ld</b> | 8  | 2.482184000  | -2.010365000 | 0.647240000  | 8  | 2.679678000  | -1.919309000 | 0.735832000  | 8  | 2.746052000  | -1.555264000 | 1.868124000  |
|                                      | 8  | -1.868741000 | -0.860744000 | -1.271028000 | 8  | -1.792453000 | -0.854489000 | -1.239500000 | 8  | -4.331870000 | -0.589497000 | 0.443026000  |
|                                      | 8  | 3.756597000  | -0.423041000 | -1.074705000 | 8  | 3.735801000  | -0.314660000 | -1.131735000 | 8  | 4.001870000  | -0.238348000 | -0.138133000 |
|                                      | 8  | -2.846141000 | -1.390602000 | 0.688708000  | 8  | -3.161242000 | -1.374937000 | 0.467119000  | 8  | -2.636631000 | -1.709645000 | -0.436141000 |
|                                      | 7  | -3.619092000 | 1.237970000  | 0.908779000  | 7  | -3.582295000 | 1.342444000  | 0.900832000  | 7  | -3.394269000 | 1.804996000  | -0.079943000 |
|                                      | 6  | -1.139594000 | 1.184618000  | 1.202357000  | 6  | -1.149555000 | 1.003088000  | 1.271148000  | 6  | -1.392993000 | 0.859247000  | 1.034197000  |
|                                      | 6  | -2.335909000 | 0.902871000  | 0.251632000  | 6  | -2.331812000 | 0.879230000  | 0.274906000  | 6  | -2.402024000 | 0.685431000  | -0.125265000 |
|                                      | 6  | 0.177964000  | 0.783647000  | 0.607780000  | 6  | 0.167333000  | 0.651311000  | 0.661506000  | 6  | 0.026418000  | 0.520796000  | 0.677720000  |
|                                      | 6  | 0.743497000  | -0.443424000 | 0.916831000  | 6  | 0.830540000  | -0.500579000 | 1.012420000  | 6  | 0.733572000  | -0.415745000 | 1.412232000  |
|                                      | 6  | 0.831240000  | 1.637350000  | -0.304198000 | 6  | 0.730061000  | 1.528354000  | -0.325421000 | 6  | 0.662765000  | 1.205067000  | -0.387863000 |
|                                      | 6  | 1.946523000  | -0.827365000 | 0.336623000  | 6  | 2.044085000  | -0.813216000 | 0.400817000  | 6  | 2.059665000  | -0.701080000 | 1.102994000  |
|                                      | 6  | -2.394893000 | -0.581938000 | -0.077675000 | 6  | -2.498513000 | -0.567965000 | -0.144767000 | 6  | -3.193146000 | -0.627559000 | -0.031057000 |
|                                      | 6  | 2.030322000  | 1.275490000  | -0.887049000 | 6  | 1.915086000  | 1.249188000  | -0.943102000 | 6  | 1.958703000  | 0.933453000  | -0.728939000 |
|                                      | 6  | 2.596721000  | 0.045066000  | -0.576860000 | 6  | 2.594810000  | 0.073720000  | -0.601906000 | 6  | 2.687698000  | -0.034009000 | -0.000399000 |
|                                      | 1  | -1.313250000 | 0.643958000  | 2.134088000  | 1  | -1.350415000 | 0.372766000  | 2.136938000  | 1  | -1.716377000 | 0.281005000  | 1.898174000  |
|                                      | 1  | -1.141925000 | 2.253670000  | 1.426754000  | 1  | -1.128229000 | 2.046898000  | 1.593881000  | 1  | -1.411473000 | 1.912082000  | 1.329519000  |
|                                      | 1  | -2.240797000 | 1.485602000  | -0.660671000 | 1  | -2.140070000 | 1.488415000  | -0.604413000 | 1  | -1.911060000 | 0.757416000  | -1.092195000 |
|                                      | 1  | 0.272201000  | -1.122067000 | 1.615682000  | 1  | 0.428403000  | -1.179975000 | 1.751073000  | 1  | 0.272534000  | -0.938130000 | 2.238672000  |
|                                      | 1  | 0.394255000  | 2.597422000  | -0.546620000 | 1  | 0.192122000  | 2.432033000  | -0.579143000 | 1  | 0.111142000  | 1.950506000  | -0.944290000 |
|                                      | 1  | 2.531197000  | 1.941577000  | -1.578634000 | 1  | 2.341972000  | 1.908527000  | -1.686819000 | 1  | 2.459450000  | 1.458098000  | -1.531742000 |
|                                      | 1  | -3.567134000 | 2.151233000  | 1.352213000  | 1  | -3.442499000 | 2.287769000  | 1.250841000  | 1  | -2.916877000 | 2.708937000  | -0.103963000 |
|                                      | 1  | -3.796366000 | 0.543192000  | 1.635512000  | 1  | -3.795935000 | 0.754047000  | 1.704994000  | 1  | -3.956148000 | 1.744684000  | 0.774086000  |
|                                      | 1  | 3.326391000  | -2.131929000 | 0.185636000  | 1  | 3.510390000  | -2.023583000 | 0.237482000  | 1  | 3.655779000  | -1.656987000 | 1.542683000  |
|                                      | 1  | -1.907534000 | -1.822783000 | -1.409186000 | 1  | -1.872396000 | -1.805550000 | -1.435768000 | 1  | 4.363556000  | 0.257901000  | -0.890551000 |
|                                      | 1  | 4.175407000  | 0.204042000  | -1.678832000 | 1  | 4.065746000  | 0.308297000  | -1.803862000 | 1  | -4.037700000 | 1.751361000  | -0.873028000 |
|                                      | 79 | -7.455730000 | 1.233565000  | -1.829958000 | 79 | -7.385724000 | 1.398151000  | -1.874230000 | 79 | -0.640930000 | -1.921579000 | -1.075149000 |
|                                      | 79 | -5.343475000 | 1.228785000  | -0.358948000 | 79 | -5.310970000 | 1.365824000  | -0.373651000 | 79 | 1.848199000  | -2.056016000 | -1.626089000 |
| <b>Au<sub>2</sub><sup>-</sup>-Ld</b> | 8  | 1.708340000  | -2.851013000 | 0.898628000  | 8  | 2.714021000  | -1.490074000 | 1.710192000  | 8  | 2.412985000  | -2.243277000 | 0.418972000  |
|                                      | 8  | -1.496401000 | -0.523726000 | -1.904790000 | 8  | -1.064104000 | -1.273254000 | -1.396259000 | 8  | -1.383502000 | -0.446080000 | -2.241479000 |
|                                      | 8  | 3.794051000  | -1.534772000 | -0.041900000 | 8  | 4.202139000  | -0.059143000 | -0.054762000 | 8  | 3.969853000  | -0.095713000 | -0.161373000 |
|                                      | 8  | -3.100007000 | -0.861327000 | -0.373746000 | 8  | -2.349528000 | -1.766340000 | 0.377149000  | 8  | -3.273290000 | -1.261555000 | -1.341834000 |
|                                      | 7  | -3.248780000 | 1.947237000  | -0.197520000 | 7  | -3.630500000 | 0.725316000  | -0.098425000 | 7  | -3.818423000 | 1.052390000  | -0.091551000 |
|                                      | 6  | -1.085049000 | 1.180675000  | 0.867439000  | 6  | -1.288568000 | 1.152392000  | 0.732123000  | 6  | -1.585404000 | 0.556962000  | 0.794358000  |
|                                      | 6  | -1.971791000 | 1.265378000  | -0.405152000 | 6  | -2.205999000 | 0.525186000  | -0.352702000 | 6  | -2.397773000 | 0.791932000  | -0.487821000 |
|                                      | 6  | 0.240159000  | 0.498780000  | 0.663291000  | 6  | 0.178767000  | 0.882352000  | 0.535088000  | 6  | -0.108640000 | 0.413862000  | 0.550200000  |
|                                      | 6  | 0.373913000  | -0.870905000 | 0.906883000  | 6  | 0.801757000  | -0.156866000 | 1.227286000  | 6  | 0.492857000  | -0.842381000 | 0.598595000  |
|                                      | 6  | 1.337083000  | 1.201144000  | 0.174548000  | 6  | 0.926185000  | 1.612256000  | -0.386963000 | 6  | 0.677834000  | 1.525500000  | 0.256743000  |
|                                      | 6  | 1.574620000  | -1.511112000 | 0.659119000  | 6  | 2.136984000  | -0.457176000 | 1.011322000  | 6  | 1.850096000  | -0.988675000 | 0.359000000  |

|                                      |    |              |              |              |    |              |              |              |    |              |              |              |
|--------------------------------------|----|--------------|--------------|--------------|----|--------------|--------------|--------------|----|--------------|--------------|--------------|
|                                      | 6  | -2.273392000 | -0.140707000 | -0.879457000 | 6  | -1.909304000 | -0.955166000 | -0.414517000 | 6  | -2.353083000 | -0.411692000 | -1.446570000 |
|                                      | 6  | 2.549684000  | 0.565891000  | -0.076136000 | 6  | 2.267467000  | 1.317454000  | -0.606808000 | 6  | 2.039525000  | 1.385309000  | 0.012860000  |
|                                      | 6  | 2.673475000  | -0.794295000 | 0.162508000  | 6  | 2.878407000  | 0.287014000  | 0.091428000  | 6  | 2.629596000  | 0.131246000  | 0.062093000  |
|                                      | 1  | -1.668288000 | 0.669872000  | 1.638524000  | 1  | -1.614662000 | 0.767673000  | 1.700628000  | 1  | -1.972960000 | -0.335251000 | 1.288710000  |
|                                      | 1  | -0.929502000 | 2.210291000  | 1.203021000  | 1  | -1.484755000 | 2.226277000  | 0.715527000  | 1  | -1.770876000 | 1.403239000  | 1.460397000  |
|                                      | 1  | -1.411078000 | 1.778935000  | -1.186720000 | 1  | -1.953539000 | 0.962650000  | -1.317066000 | 1  | -2.045550000 | 1.681827000  | -1.003897000 |
|                                      | 1  | -0.456618000 | -1.451637000 | 1.290786000  | 1  | 0.245138000  | -0.755160000 | 1.938057000  | 1  | -0.095667000 | -1.723654000 | 0.821763000  |
|                                      | 1  | 1.256947000  | 2.265105000  | -0.017205000 | 1  | 0.461073000  | 2.417925000  | -0.941138000 | 1  | 0.227976000  | 2.509604000  | 0.216931000  |
|                                      | 1  | 3.398633000  | 1.123725000  | -0.457766000 | 1  | 2.851197000  | 1.886394000  | -1.320861000 | 1  | 2.654686000  | 2.248250000  | -0.213744000 |
|                                      | 1  | -3.094744000 | 2.809628000  | 0.312708000  | 1  | -3.793608000 | 1.721680000  | 0.012982000  | 1  | -3.883583000 | 1.871123000  | 0.517233000  |
|                                      | 1  | -3.845888000 | 1.356535000  | 0.372808000  | 1  | -3.859967000 | 0.300606000  | 0.796398000  | 1  | -4.197760000 | 0.243186000  | 0.432904000  |
|                                      | 1  | 2.627031000  | -3.069660000 | 0.678928000  | 1  | 3.613830000  | -1.626360000 | 1.379028000  | 1  | 3.359687000  | -2.168330000 | 0.229234000  |
|                                      | 1  | -1.672756000 | -1.464465000 | -2.065860000 | 1  | -0.726343000 | -2.195632000 | -1.266532000 | 1  | 4.416628000  | 0.742066000  | -0.344750000 |
|                                      | 1  | 4.581714000  | -0.972741000 | -0.279070000 | 1  | 4.592856000  | 0.442567000  | -0.783278000 | 1  | -4.409237000 | 1.198502000  | -0.911355000 |
|                                      | 79 | 6.468955000  | 0.170363000  | -0.714395000 | 79 | 0.659605000  | -4.001019000 | -0.613057000 | 79 | -4.402205000 | 0.840285000  | 3.624182000  |
|                                      | 79 | 5.484759000  | 2.500304000  | -1.595973000 | 79 | 2.295168000  | -2.510476000 | -2.126792000 | 79 | -4.957280000 | -1.325236000 | 2.142424000  |
| <b>Au<sub>3</sub><sup>0</sup>-Ld</b> | 8  | 2.762775000  | 0.945396000  | 2.151769000  | 8  | 2.811600000  | -0.997907000 | -1.595632000 | 8  | 1.470768000  | -1.981456000 | 2.043014000  |
|                                      | 8  | -3.850118000 | -1.369424000 | -1.274772000 | 8  | -3.235746000 | -1.871388000 | 0.861695000  | 8  | -1.979302000 | -0.305292000 | -1.710773000 |
|                                      | 8  | 3.848596000  | 1.453585000  | -0.266535000 | 8  | 4.159733000  | -0.383724000 | 0.666010000  | 8  | 3.210898000  | -1.391703000 | 0.035033000  |
|                                      | 8  | -4.600684000 | -0.006018000 | 0.346870000  | 8  | -2.148961000 | -0.455359000 | 2.216293000  | 8  | -2.992744000 | -0.754914000 | 0.249433000  |
|                                      | 7  | -2.272574000 | 1.428253000  | 0.429665000  | 7  | -3.669786000 | 0.649028000  | -0.501855000 | 7  | -3.831889000 | 1.891935000  | 0.281958000  |
|                                      | 6  | -1.292059000 | -0.858882000 | 0.113579000  | 6  | -1.279588000 | 1.169066000  | 0.045558000  | 6  | -1.435307000 | 1.757732000  | 0.858169000  |
|                                      | 6  | -2.305602000 | 0.196187000  | -0.382524000 | 6  | -2.358790000 | 0.096186000  | -0.142494000 | 6  | -2.483887000 | 1.499764000  | -0.241213000 |
|                                      | 6  | 0.133211000  | -0.388807000 | 0.004419000  | 6  | 0.125220000  | 0.686594000  | 0.280271000  | 6  | -0.159962000 | 0.984185000  | 0.643453000  |
|                                      | 6  | 0.845848000  | -0.026368000 | 1.144915000  | 6  | 0.776814000  | -0.123669000 | -0.696042000 | 6  | 0.107899000  | -0.128389000 | 1.439388000  |
|                                      | 6  | 0.715874000  | -0.216077000 | -1.247856000 | 6  | 0.845701000  | 1.085335000  | 1.390923000  | 6  | 0.727680000  | 1.308447000  | -0.379841000 |
|                                      | 6  | 2.103747000  | 0.553477000  | 1.037256000  | 6  | 2.152034000  | -0.429064000 | -0.556266000 | 6  | 1.235949000  | -0.903274000 | 1.224890000  |
|                                      | 6  | -3.712758000 | -0.381094000 | -0.374318000 | 6  | -2.545735000 | -0.748980000 | 1.108470000  | 6  | -2.491865000 | 0.023273000  | -0.640623000 |
|                                      | 6  | 1.968413000  | 0.371505000  | -1.361669000 | 6  | 2.188740000  | 0.731105000  | 1.554481000  | 6  | 1.856887000  | 0.529823000  | -0.606705000 |
|                                      | 6  | 2.645950000  | 0.783623000  | -0.227732000 | 6  | 2.844353000  | -0.021010000 | 0.602946000  | 6  | 2.115283000  | -0.576366000 | 0.190395000  |
|                                      | 1  | -1.448710000 | -1.757741000 | -0.483382000 | 1  | -1.575380000 | 1.822296000  | 0.867485000  | 1  | -1.868325000 | 1.463259000  | 1.815195000  |
|                                      | 1  | -1.532470000 | -1.114451000 | 1.149352000  | 1  | -1.290913000 | 1.770690000  | -0.867703000 | 1  | -1.246023000 | 2.832170000  | 0.892230000  |
|                                      | 1  | -2.055720000 | 0.465252000  | -1.409485000 | 1  | -2.063902000 | -0.586953000 | -0.940024000 | 1  | -2.296324000 | 2.105733000  | -1.121876000 |
|                                      | 1  | 0.417969000  | -0.143251000 | 2.132348000  | 1  | 0.323511000  | -0.267976000 | -1.669614000 | 1  | -0.570747000 | -0.409741000 | 2.234206000  |
|                                      | 1  | 0.179048000  | -0.501801000 | -2.143692000 | 1  | 0.366574000  | 1.694094000  | 2.145619000  | 1  | 0.533892000  | 2.164118000  | -1.014048000 |
|                                      | 1  | 2.411341000  | 0.541177000  | -2.333820000 | 1  | 2.734879000  | 1.053712000  | 2.432625000  | 1  | 2.547989000  | 0.775223000  | -1.404352000 |
|                                      | 1  | -2.395366000 | 1.186456000  | 1.409592000  | 1  | -3.583114000 | 1.101730000  | -1.406436000 | 1  | -3.819207000 | 2.856533000  | 0.623432000  |
|                                      | 1  | -3.077405000 | 2.002691000  | 0.195444000  | 1  | -3.905609000 | 1.382616000  | 0.161875000  | 1  | -4.097020000 | 1.276492000  | 1.056483000  |
|                                      | 1  | 3.538150000  | 1.451174000  | 1.864942000  | 1  | 3.722977000  | -1.194464000 | -1.327532000 | 1  | 2.218831000  | -2.485821000 | 1.691071000  |
|                                      | 1  | -4.760949000 | -1.700417000 | -1.216101000 | 1  | -3.325198000 | -2.376082000 | 1.689164000  | 1  | 3.707774000  | -1.126390000 | -0.750908000 |
|                                      | 1  | 3.776117000  | 2.176680000  | -0.905855000 | 1  | 4.553199000  | -0.070330000 | 1.492781000  | 1  | -4.547278000 | 1.816845000  | -0.445102000 |
|                                      | 79 | 1.499243000  | 4.301680000  | 0.879244000  | 79 | 2.078764000  | -4.031004000 | 1.561200000  | 79 | -2.266164000 | -2.766705000 | 0.191939000  |

|                                      |    |              |              |              |    |              |              |              |    |              |              |              |
|--------------------------------------|----|--------------|--------------|--------------|----|--------------|--------------|--------------|----|--------------|--------------|--------------|
|                                      | 79 | -0.511818000 | 2.722950000  | 0.268012000  | 79 | -0.686141000 | -4.332785000 | 1.198761000  | 79 | 0.202376000  | -3.572661000 | -0.907999000 |
|                                      | 79 | 1.149732000  | 3.614346000  | -1.780758000 | 79 | 0.490667000  | -2.160978000 | 0.294361000  | 79 | -1.582341000 | -5.269400000 | 0.414161000  |
| <b>Au<sub>3</sub><sup>+</sup>-Ld</b> | 8  | 3.457550000  | -0.623919000 | 2.163453000  | 8  | 2.347558000  | -2.046071000 | -0.443971000 | 8  | 2.791357000  | -2.319106000 | 0.626658000  |
|                                      | 8  | -1.709197000 | -0.607487000 | -2.373754000 | 8  | -2.366185000 | 0.657703000  | -2.129615000 | 8  | -3.075124000 | 0.909248000  | -2.228714000 |
|                                      | 8  | 4.446182000  | 0.195675000  | -0.170968000 | 8  | 4.166099000  | -0.048642000 | -0.160107000 | 8  | 4.242618000  | -0.022566000 | 0.520332000  |
|                                      | 8  | -2.461263000 | -1.905591000 | -0.707259000 | 8  | -2.628377000 | -1.005277000 | -0.655727000 | 8  | -4.508449000 | 1.029809000  | -0.537439000 |
|                                      | 7  | -3.568922000 | 0.568579000  | 0.160031000  | 7  | -3.562491000 | 1.537754000  | 0.671452000  | 7  | -2.727340000 | 1.913118000  | 1.237336000  |
|                                      | 6  | -1.151452000 | 0.351403000  | 0.855256000  | 6  | -1.269581000 | 0.723027000  | 1.341278000  | 6  | -1.448714000 | 0.007307000  | 0.274962000  |
|                                      | 6  | -2.193258000 | 0.444176000  | -0.285097000 | 6  | -2.206289000 | 1.212054000  | 0.222381000  | 6  | -2.193030000 | 1.313713000  | -0.024837000 |
|                                      | 6  | 0.308748000  | 0.255366000  | 0.474636000  | 6  | 0.165772000  | 0.546791000  | 0.929164000  | 6  | 0.054874000  | 0.090896000  | 0.417266000  |
|                                      | 6  | 1.217137000  | -0.326884000 | 1.418521000  | 6  | 0.630794000  | -0.657543000 | 0.420629000  | 6  | 0.769060000  | -1.094518000 | 0.504277000  |
|                                      | 6  | 0.827889000  | 0.779528000  | -0.692171000 | 6  | 1.076756000  | 1.611909000  | 1.063594000  | 6  | 0.774632000  | 1.303545000  | 0.397562000  |
|                                      | 6  | 2.613315000  | -0.277942000 | 1.185391000  | 6  | 1.961073000  | -0.832421000 | 0.044794000  | 6  | 2.159620000  | -1.115641000 | 0.546733000  |
|                                      | 6  | -2.137502000 | -0.803404000 | -1.143004000 | 6  | -2.395312000 | 0.155572000  | -0.847922000 | 6  | -3.361642000 | 1.076109000  | -0.985709000 |
|                                      | 6  | 2.205582000  | 0.758062000  | -0.951260000 | 6  | 2.439785000  | 1.447417000  | 0.690746000  | 6  | 2.197125000  | 1.288925000  | 0.408192000  |
|                                      | 6  | 3.094487000  | 0.231814000  | -0.041187000 | 6  | 2.876157000  | 0.209997000  | 0.184231000  | 6  | 2.884941000  | 0.075772000  | 0.485206000  |
|                                      | 1  | -1.420399000 | -0.495250000 | 1.490085000  | 1  | -1.665955000 | -0.214459000 | 1.735406000  | 1  | -1.656740000 | -0.695925000 | -0.531748000 |
|                                      | 1  | -1.292588000 | 1.249814000  | 1.464711000  | 1  | -1.329129000 | 1.470916000  | 2.133151000  | 1  | -1.881609000 | -0.443170000 | 1.171932000  |
|                                      | 1  | -1.973695000 | 1.296037000  | -0.926371000 | 1  | -1.783086000 | 2.106375000  | -0.232595000 | 1  | -1.545907000 | 2.066978000  | -0.463536000 |
|                                      | 1  | 0.892741000  | -0.501599000 | 2.438902000  | 1  | -0.041416000 | -1.498859000 | 0.311935000  | 1  | 0.246641000  | -2.043195000 | 0.511591000  |
|                                      | 1  | 0.180742000  | 1.227748000  | -1.431230000 | 1  | 0.782678000  | 2.507989000  | 1.593441000  | 1  | 0.275074000  | 2.252537000  | 0.536709000  |
|                                      | 1  | 2.578448000  | 1.175478000  | -1.879157000 | 1  | 3.179121000  | 2.185209000  | 0.979768000  | 1  | 2.747596000  | 2.214740000  | 0.518899000  |
|                                      | 1  | -3.760908000 | 1.485017000  | 0.541808000  | 1  | -3.507557000 | 2.343386000  | 1.286771000  | 1  | -1.981447000 | 2.029024000  | 1.927839000  |
|                                      | 1  | -3.817311000 | -0.139069000 | 0.840576000  | 1  | -3.918716000 | 0.765642000  | 1.228782000  | 1  | -3.455679000 | 1.310459000  | 1.629952000  |
|                                      | 1  | 4.371596000  | -0.535329000 | 1.850940000  | 1  | 3.290043000  | -2.018889000 | -0.669417000 | 1  | 3.750886000  | -2.183646000 | 0.606770000  |
|                                      | 1  | -1.722489000 | -1.443580000 | -2.872665000 | 1  | -2.554713000 | -0.062245000 | -2.761413000 | 1  | 4.645715000  | 0.856753000  | 0.481838000  |
|                                      | 1  | 4.744119000  | 0.641695000  | -0.972815000 | 1  | 4.715874000  | 0.740005000  | -0.044698000 | 1  | -3.147372000 | 2.827342000  | 1.055912000  |
|                                      | 79 | 1.187090000  | -2.427536000 | 0.611967000  | 79 | -0.718107000 | 2.057000000  | -2.760743000 | 79 | 1.056799000  | 1.612711000  | -4.451835000 |
|                                      | 79 | -1.011962000 | -3.562016000 | -0.557283000 | 79 | 1.432650000  | 2.478294000  | -1.111758000 | 79 | -1.158919000 | 1.205776000  | -3.087152000 |
|                                      | 79 | 1.093907000  | -5.017302000 | -0.070225000 | 79 | 1.219630000  | 3.643476000  | -3.490857000 | 79 | 1.308870000  | 1.485997000  | -1.834118000 |
| <b>Au<sub>3</sub><sup>-</sup>-Ld</b> | 8  | 2.228143000  | -1.936053000 | 1.468825000  | 8  | 2.378073000  | -2.181102000 | 0.173914000  | 8  | 2.449868000  | -2.269386000 | 0.176536000  |
|                                      | 8  | -1.417198000 | -0.709600000 | -1.526590000 | 8  | -2.083044000 | -0.675680000 | -1.058630000 | 8  | -1.647371000 | -0.520144000 | -1.599286000 |
|                                      | 8  | 3.867827000  | -0.312809000 | -0.281227000 | 8  | 3.564472000  | -0.447512000 | -1.547131000 | 8  | 4.067835000  | -0.186491000 | -0.473452000 |
|                                      | 8  | -2.973565000 | -1.327544000 | -0.018075000 | 8  | -2.884251000 | -1.317236000 | 0.938475000  | 8  | -3.537902000 | -0.791098000 | -0.417212000 |
|                                      | 7  | -3.771272000 | 1.330475000  | 0.082588000  | 7  | -3.473759000 | 1.402029000  | 1.391842000  | 7  | -3.443551000 | 1.650221000  | 0.576615000  |
|                                      | 6  | -1.432176000 | 1.237299000  | 1.020072000  | 6  | -0.988026000 | 1.141308000  | 1.444578000  | 6  | -1.237665000 | 0.764052000  | 1.304198000  |
|                                      | 6  | -2.376281000 | 0.991527000  | -0.189358000 | 6  | -2.287009000 | 0.994136000  | 0.620461000  | 6  | -2.147529000 | 1.070110000  | 0.105804000  |
|                                      | 6  | 0.001161000  | 0.864824000  | 0.761371000  | 6  | 0.248005000  | 0.760205000  | 0.675878000  | 6  | 0.186972000  | 0.526106000  | 0.878539000  |
|                                      | 6  | 0.506910000  | -0.346963000 | 1.219826000  | 6  | 0.779776000  | -0.524504000 | 0.789369000  | 6  | 0.691521000  | -0.766213000 | 0.749601000  |
|                                      | 6  | 0.819373000  | 1.665540000  | -0.031048000 | 6  | 0.845383000  | 1.659421000  | -0.204178000 | 6  | 1.008265000  | 1.603901000  | 0.557741000  |
|                                      | 6  | 1.790167000  | -0.774750000 | 0.902706000  | 6  | 1.881145000  | -0.905169000 | 0.039712000  | 6  | 1.984892000  | -0.979247000 | 0.299222000  |

|                                      |    |              |              |              |    |              |              |              |    |              |              |              |
|--------------------------------------|----|--------------|--------------|--------------|----|--------------|--------------|--------------|----|--------------|--------------|--------------|
|                                      | 6  | -2.307177000 | -0.481568000 | -0.570235000 | 6  | -2.468185000 | -0.449531000 | 0.200892000  | 6  | -2.474937000 | -0.188469000 | -0.720759000 |
|                                      | 6  | 2.092909000  | 1.239990000  | -0.377707000 | 6  | 1.953139000  | 1.284564000  | -0.956958000 | 6  | 2.306415000  | 1.397478000  | 0.104808000  |
|                                      | 6  | 2.591820000  | 0.021903000  | 0.069437000  | 6  | 2.472960000  | 0.004478000  | -0.840103000 | 6  | 2.797710000  | 0.108168000  | -0.029418000 |
|                                      | 1  | -1.825915000 | 0.668957000  | 1.866255000  | 1  | -1.083888000 | 0.528144000  | 2.342537000  | 1  | -1.631221000 | -0.096813000 | 1.847644000  |
|                                      | 1  | -1.513123000 | 2.300275000  | 1.271810000  | 1  | -0.935310000 | 2.186604000  | 1.754020000  | 1  | -1.271671000 | 1.624449000  | 1.977544000  |
|                                      | 1  | -2.012095000 | 1.576364000  | -1.035563000 | 1  | -2.223707000 | 1.616137000  | -0.269073000 | 1  | -1.683113000 | 1.820035000  | -0.532041000 |
|                                      | 1  | -0.103615000 | -1.005954000 | 1.824674000  | 1  | 0.332603000  | -1.246472000 | 1.461788000  | 1  | 0.073936000  | -1.623851000 | 0.985434000  |
|                                      | 1  | 0.450342000  | 2.612832000  | -0.407589000 | 1  | 0.445376000  | 2.660398000  | -0.305903000 | 1  | 0.631065000  | 2.614154000  | 0.648379000  |
|                                      | 1  | 2.731426000  | 1.842570000  | -1.011217000 | 1  | 2.422733000  | 1.982902000  | -1.639697000 | 1  | 2.945441000  | 2.235086000  | -0.147818000 |
|                                      | 1  | -3.821634000 | 2.149595000  | 0.677688000  | 1  | -3.334311000 | 2.350012000  | 1.731032000  | 1  | -3.312702000 | 2.306685000  | 1.347829000  |
|                                      | 1  | -4.191315000 | 0.554967000  | 0.586490000  | 1  | -3.565314000 | 0.802886000  | 2.209354000  | 1  | -4.055967000 | 0.877779000  | 0.858921000  |
|                                      | 1  | 2.788701000  | -2.446397000 | 0.849907000  | 1  | 3.131194000  | -2.287091000 | -0.425697000 | 1  | 3.359654000  | -2.242631000 | -0.154059000 |
|                                      | 1  | -1.274889000 | -1.685847000 | -1.657371000 | 1  | -2.164439000 | -1.627500000 | -1.250016000 | 1  | 4.532579000  | 0.631010000  | -0.699160000 |
|                                      | 1  | 3.957873000  | -1.281903000 | -0.409302000 | 1  | 3.889944000  | 0.253774000  | -2.128011000 | 1  | -3.901227000 | 2.145847000  | -0.206895000 |
|                                      | 79 | 1.665643000  | -3.585766000 | -1.557517000 | 79 | -7.588431000 | 1.263588000  | -1.119599000 | 79 | -1.879426000 | 3.018872000  | -2.804302000 |
|                                      | 79 | -0.819472000 | -3.846338000 | -2.274801000 | 79 | -9.871622000 | 1.180639000  | -2.546593000 | 79 | -4.464963000 | 3.129732000  | -2.444397000 |
|                                      | 79 | 4.172305000  | -3.574829000 | -0.786958000 | 79 | -5.396453000 | 1.337294000  | 0.243004000  | 79 | 0.701875000  | 2.754339000  | -2.943600000 |
| <b>Au<sub>4</sub><sup>0</sup>-Ld</b> | 8  | 2.667445000  | -1.740284000 | 0.687950000  | 8  | 2.704619000  | -1.756756000 | 0.632955000  | 8  | 2.210578000  | -2.053076000 | -0.757743000 |
|                                      | 8  | -2.165012000 | -1.396823000 | -0.733351000 | 8  | -1.977951000 | -1.323353000 | -0.828804000 | 8  | -1.977235000 | 0.297114000  | -2.097579000 |
|                                      | 8  | 3.592640000  | -0.244569000 | -1.336975000 | 8  | 3.614529000  | -0.135852000 | -1.345706000 | 8  | 4.108200000  | -0.207642000 | -0.163313000 |
|                                      | 8  | -2.495641000 | -1.609312000 | 1.490387000  | 8  | -2.583307000 | -1.744399000 | 1.293605000  | 8  | -3.331499000 | -0.723838000 | -0.665248000 |
|                                      | 7  | -3.702663000 | 0.888164000  | 1.244195000  | 7  | -3.709317000 | 0.854554000  | 1.264766000  | 7  | -3.549425000 | 1.557722000  | 0.771724000  |
|                                      | 6  | -1.214061000 | 1.162782000  | 1.304213000  | 6  | -1.228096000 | 1.072897000  | 1.352034000  | 6  | -1.317976000 | 0.670876000  | 1.259492000  |
|                                      | 6  | -2.419874000 | 0.581445000  | 0.552364000  | 6  | -2.440717000 | 0.543904000  | 0.562447000  | 6  | -2.228642000 | 1.214273000  | 0.146540000  |
|                                      | 6  | 0.087768000  | 0.843502000  | 0.616624000  | 6  | 0.077158000  | 0.798906000  | 0.654076000  | 6  | 0.121204000  | 0.478083000  | 0.865799000  |
|                                      | 6  | 0.811410000  | -0.290938000 | 0.982028000  | 6  | 0.821515000  | -0.336958000 | 0.972881000  | 6  | 0.535189000  | -0.686608000 | 0.222620000  |
|                                      | 6  | 0.549516000  | 1.635150000  | -0.429534000 | 6  | 0.531619000  | 1.639291000  | -0.359038000 | 6  | 1.070411000  | 1.458998000  | 1.151014000  |
|                                      | 6  | 1.976338000  | -0.632280000 | 0.314823000  | 6  | 1.993839000  | -0.628912000 | 0.294333000  | 6  | 1.860257000  | -0.886153000 | -0.134602000 |
|                                      | 6  | -2.352905000 | -0.943167000 | 0.494835000  | 6  | -2.351540000 | -0.961727000 | 0.397878000  | 6  | -2.535731000 | 0.179664000  | -0.954780000 |
|                                      | 6  | 1.718539000  | 1.299815000  | -1.104447000 | 6  | 1.708539000  | 1.352667000  | -1.042116000 | 6  | 2.426381000  | 1.281961000  | 0.787934000  |
|                                      | 6  | 2.428902000  | 0.170456000  | -0.737496000 | 6  | 2.440971000  | 0.220270000  | -0.721139000 | 6  | 2.820754000  | 0.086728000  | 0.159969000  |
|                                      | 1  | -1.216167000 | 0.757755000  | 2.318583000  | 1  | -1.237639000 | 0.612763000  | 2.341818000  | 1  | -1.741314000 | -0.271939000 | 1.612651000  |
|                                      | 1  | -1.345375000 | 2.246109000  | 1.377167000  | 1  | -1.375071000 | 2.147207000  | 1.475740000  | 1  | -1.360613000 | 1.383416000  | 2.085616000  |
|                                      | 1  | -2.473155000 | 0.981262000  | -0.457153000 | 1  | -2.476673000 | 1.009668000  | -0.418474000 | 1  | -1.828665000 | 2.133595000  | -0.272251000 |
|                                      | 1  | 0.472395000  | -0.932647000 | 1.785244000  | 1  | 0.490438000  | -1.010974000 | 1.753548000  | 1  | -0.179240000 | -1.466890000 | -0.008532000 |
|                                      | 1  | 0.001307000  | 2.521045000  | -0.725009000 | 1  | -0.034558000 | 2.524439000  | -0.620239000 | 1  | 0.786929000  | 2.345322000  | 1.701407000  |
|                                      | 1  | 2.078401000  | 1.920637000  | -1.917288000 | 1  | 2.067226000  | 2.007121000  | -1.827855000 | 1  | 3.189928000  | 1.953624000  | 1.163499000  |
|                                      | 1  | -3.787398000 | 1.887388000  | 1.402731000  | 1  | -3.790075000 | 1.864872000  | 1.358922000  | 1  | -3.421822000 | 2.146086000  | 1.598385000  |
|                                      | 1  | -3.684784000 | 0.426360000  | 2.152311000  | 1  | -3.674661000 | 0.468998000  | 2.207543000  | 1  | -4.027502000 | 0.693467000  | 1.044786000  |
|                                      | 1  | 3.435439000  | -1.831788000 | 0.108012000  | 1  | 3.485812000  | -1.814975000 | 0.063467000  | 1  | 3.161121000  | -2.044315000 | -0.945246000 |
|                                      | 1  | -2.380700000 | -2.363847000 | -0.774613000 | 1  | -1.978477000 | -2.298305000 | -0.890075000 | 1  | 4.693396000  | 0.531358000  | 0.057518000  |
|                                      | 1  | 3.812221000  | 0.332172000  | -2.076022000 | 1  | 3.825509000  | 0.507166000  | -2.036561000 | 1  | -4.150829000 | 2.054680000  | 0.110815000  |

|                                      |             |              |              |              |              |              |              |              |              |              |              |              |
|--------------------------------------|-------------|--------------|--------------|--------------|--------------|--------------|--------------|--------------|--------------|--------------|--------------|--------------|
|                                      | 79          | -5.435684000 | 0.093133000  | 0.216682000  | 79           | -5.451884000 | 0.080957000  | 0.305220000  | 79           | 1.308801000  | 3.509452000  | -3.563147000 |
|                                      | 79          | -7.594233000 | -0.744583000 | -0.981688000 | 79           | -7.688585000 | -0.684904000 | -0.815427000 | 79           | -0.407554000 | 1.708489000  | -2.543642000 |
|                                      | 79          | -3.707086000 | -4.283139000 | -1.262694000 | 79           | -3.977693000 | -4.325069000 | -1.498870000 | 79           | 1.912137000  | 5.090803000  | -5.568765000 |
|                                      | 79          | -5.505524000 | -2.447439000 | -1.029230000 | 79           | -5.633471000 | -2.397135000 | -1.044276000 | 79           | 1.763504000  | 2.412320000  | -1.166512000 |
| <b>Au<sub>4</sub><sup>+</sup>-Ld</b> | 8           | 3.474545000  | -0.256642000 | 2.035174000  | 8            | 2.944534000  | -1.625270000 | 0.716052000  | 8            | 2.326726000  | -2.072460000 | -0.460573000 |
|                                      | 8           | -2.729381000 | 0.994541000  | -2.357329000 | 8            | -1.525659000 | -1.359909000 | -1.045983000 | 8            | -1.613887000 | 0.074148000  | -1.969582000 |
|                                      | 8           | 4.296534000  | 0.493618000  | -0.383130000 | 8            | 3.844527000  | 0.157340000  | -1.127874000 | 8            | 4.204877000  | -0.124440000 | -0.243890000 |
|                                      | 8           | -2.355991000 | -1.035762000 | -1.568184000 | 8            | -2.679156000 | -2.062319000 | 0.737582000  | 8            | -3.008589000 | -0.870621000 | -0.530972000 |
|                                      | 7           | -3.648551000 | 0.845146000  | 0.494113000  | 7            | -3.718790000 | 0.549985000  | 1.035842000  | 7            | -3.456910000 | 1.527119000  | 0.676400000  |
|                                      | 6           | -1.239711000 | 0.340293000  | 0.922172000  | 6            | -1.268312000 | 0.808284000  | 1.237692000  | 6            | -1.180744000 | 0.843771000  | 1.295188000  |
|                                      | 6           | -2.292404000 | 0.896253000  | -0.034850000 | 6            | -2.434642000 | 0.314354000  | 0.339876000  | 6            | -2.099375000 | 1.221549000  | 0.122383000  |
|                                      | 6           | 0.202894000  | 0.359921000  | 0.475811000  | 6            | 0.091840000  | 0.671855000  | 0.612426000  | 6            | 0.247623000  | 0.608746000  | 0.892497000  |
|                                      | 6           | 1.188332000  | -0.117729000 | 1.397211000  | 6            | 0.914682000  | -0.401973000 | 0.950120000  | 6            | 0.664351000  | -0.619989000 | 0.404372000  |
|                                      | 6           | 0.630348000  | 0.856572000  | -0.738893000 | 6            | 0.536973000  | 1.591857000  | -0.333050000 | 6            | 1.190988000  | 1.644463000  | 1.007381000  |
|                                      | 6           | 2.562987000  | -0.004404000 | 1.089814000  | 6            | 2.157988000  | -0.555306000 | 0.358274000  | 6            | 1.983521000  | -0.841464000 | 0.015313000  |
|                                      | 6           | -2.422967000 | 0.172065000  | -1.370486000 | 6            | -2.250661000 | -1.150381000 | 0.031402000  | 6            | -2.269617000 | 0.058369000  | -0.867206000 |
|                                      | 6           | 1.992533000  | 0.897563000  | -1.069977000 | 6            | 1.783794000  | 1.443697000  | -0.930139000 | 6            | 2.540360000  | 1.430613000  | 0.618015000  |
|                                      | 6           | 2.952886000  | 0.465744000  | -0.183907000 | 6            | 2.597469000  | 0.373812000  | -0.588623000 | 6            | 2.929657000  | 0.176044000  | 0.123625000  |
|                                      | 1           | -1.519595000 | -0.680331000 | 1.199279000  | 1            | -1.312756000 | 0.257315000  | 2.178737000  | 1            | -1.589994000 | -0.049244000 | 1.771419000  |
|                                      | 1           | -1.327463000 | 0.928217000  | 1.840681000  | 1            | -1.482220000 | 1.857162000  | 1.449756000  | 1            | -1.222043000 | 1.661761000  | 2.016692000  |
|                                      | 1           | -2.065066000 | 1.934699000  | -0.274897000 | 1            | -2.438424000 | 0.870413000  | -0.593953000 | 1            | -1.746037000 | 2.122985000  | -0.370259000 |
|                                      | 1           | 0.925320000  | -0.263773000 | 2.439429000  | 1            | 0.590370000  | -1.134846000 | 1.678929000  | 1            | -0.036177000 | -1.440583000 | 0.313684000  |
|                                      | 1           | -0.073217000 | 1.243787000  | -1.461399000 | 1            | -0.089556000 | 2.431255000  | -0.607247000 | 1            | 0.929632000  | 2.556481000  | 1.527162000  |
|                                      | 1           | 2.294168000  | 1.287797000  | -2.034756000 | 1            | 2.136728000  | 2.159858000  | -1.662893000 | 1            | 3.304580000  | 2.155748000  | 0.870154000  |
|                                      | 1           | -3.917760000 | 1.686097000  | 0.982773000  | 1            | -3.748772000 | 1.533097000  | 1.301870000  | 1            | -3.392587000 | 2.180514000  | 1.460925000  |
|                                      | 1           | -3.818065000 | 0.033321000  | 1.072495000  | 1            | -3.732088000 | 0.017142000  | 1.905728000  | 1            | -3.896323000 | 0.659136000  | 0.999306000  |
|                                      | 1           | 4.364189000  | -0.134956000 | 1.668543000  | 1            | 3.773957000  | -1.585823000 | 0.217558000  | 1            | 3.264510000  | -2.074201000 | -0.706652000 |
|                                      | 1           | -2.923977000 | 0.480917000  | -3.160784000 | 1            | -1.371125000 | -2.316522000 | -1.162289000 | 1            | 4.777590000  | 0.650544000  | -0.151281000 |
|                                      | 1           | 4.528447000  | 0.904790000  | -1.224362000 | 1            | 4.057152000  | 0.858694000  | -1.759220000 | 1            | -4.060090000 | 1.938833000  | -0.039519000 |
|                                      | 79          | 1.212130000  | -2.291242000 | 0.723883000  | 79           | -5.584898000 | 0.150750000  | 0.047518000  | 79           | 1.106390000  | 3.688079000  | -3.530636000 |
|                                      | 79          | -1.185117000 | -2.688815000 | -0.712675000 | 79           | -7.931239000 | 0.404427000  | -1.138571000 | 79           | -1.028560000 | 3.189721000  | -5.137267000 |
|                                      | 79          | 2.766873000  | -4.496894000 | 1.063494000  | 79           | -4.887371000 | -2.605256000 | 0.280177000  | 79           | 1.498526000  | 2.513956000  | -1.185485000 |
| 79                                   | 0.280642000 | -4.756195000 | -0.010073000 | 79           | -7.351742000 | -2.124446000 | -0.484039000 | 79           | -0.649132000 | 1.734574000  | -2.866781000 |              |
| <b>Au<sub>4</sub>-Ld</b>             | 8           | 2.377374000  | -0.700123000 | 2.807062000  | 8            | 2.553600000  | -2.037947000 | 0.710372000  | 8            | 2.106795000  | -2.257571000 | 1.172684000  |
|                                      | 8           | -0.777204000 | -1.807189000 | -0.844772000 | 8            | -1.901235000 | -0.939681000 | -1.062818000 | 8            | -1.776826000 | -0.960791000 | -1.468084000 |
|                                      | 8           | 4.146360000  | -0.233730000 | 0.858163000  | 8            | 3.763656000  | -0.578286000 | -1.242898000 | 8            | 3.810901000  | -0.762878000 | -0.338085000 |
|                                      | 8           | -2.279054000 | -1.695731000 | 0.834334000  | 8            | -2.763458000 | -1.327113000 | 0.974687000  | 8            | -3.403430000 | -1.103821000 | 0.078251000  |
|                                      | 7           | -3.510646000 | 0.346526000  | -0.664351000 | 7            | -3.498592000 | 1.393298000  | 1.002137000  | 7            | -3.667154000 | 1.547322000  | 0.177212000  |
|                                      | 6           | -1.297109000 | 1.194849000  | 0.202522000  | 6            | -1.013096000 | 1.277734000  | 1.194227000  | 6            | -1.353896000 | 1.192115000  | 0.936620000  |
|                                      | 6           | -2.061506000 | 0.161853000  | -0.673912000 | 6            | -2.258223000 | 0.941212000  | 0.344528000  | 6            | -2.332140000 | 0.998653000  | -0.230738000 |
|                                      | 6           | 0.170399000  | 0.903599000  | 0.370136000  | 6            | 0.276577000  | 0.829640000  | 0.562382000  | 6            | 0.035558000  | 0.710492000  | 0.617482000  |

|    |              |              |              |    |               |              |              |    |              |              |              |
|----|--------------|--------------|--------------|----|---------------|--------------|--------------|----|--------------|--------------|--------------|
| 6  | 0.622356000  | 0.294273000  | 1.540104000  | 6  | 0.853536000   | -0.385762000 | 0.929628000  | 6  | 0.463214000  | -0.544541000 | 1.047446000  |
| 6  | 1.075776000  | 1.136178000  | -0.661340000 | 6  | 0.886436000   | 1.589503000  | -0.432938000 | 6  | 0.901362000  | 1.491143000  | -0.144600000 |
| 6  | 1.948602000  | -0.081567000 | 1.673549000  | 6  | 2.012872000   | -0.835284000 | 0.317955000  | 6  | 1.725315000  | -1.016914000 | 0.722111000  |
| 6  | -1.741020000 | -1.226770000 | -0.143151000 | 6  | -2.352737000  | -0.555965000 | 0.134358000  | 6  | -2.526037000 | -0.490554000 | -0.582458000 |
| 6  | 2.409379000  | 0.767843000  | -0.531006000 | 6  | 2.050334000   | 1.144336000  | -1.050489000 | 6  | 2.167818000  | 1.023474000  | -0.476410000 |
| 6  | 2.849716000  | 0.156868000  | 0.632349000  | 6  | 2.615285000   | -0.067254000 | -0.681744000 | 6  | 2.583431000  | -0.229628000 | -0.050716000 |
| 1  | -1.784745000 | 1.209246000  | 1.180064000  | 1  | -1.137736000  | 0.814802000  | 2.175186000  | 1  | -1.746024000 | 0.661945000  | 1.807084000  |
| 1  | -1.447431000 | 2.178060000  | -0.255250000 | 1  | -1.014012000  | 2.360545000  | 1.330793000  | 1  | -1.331748000 | 2.257811000  | 1.176735000  |
| 1  | -1.690520000 | 0.225598000  | -1.697407000 | 1  | -2.184770000  | 1.431166000  | -0.623115000 | 1  | -2.004194000 | 1.555218000  | -1.104283000 |
| 1  | -0.065380000 | 0.059771000  | 2.342542000  | 1  | 0.399509000   | -0.999361000 | 1.698089000  | 1  | -0.191283000 | -1.174070000 | 1.637632000  |
| 1  | 0.738169000  | 1.581628000  | -1.589155000 | 1  | 0.453194000   | 2.536219000  | -0.730153000 | 1  | 0.587902000  | 2.469986000  | -0.485278000 |
| 1  | 3.107768000  | 0.923379000  | -1.342080000 | 1  | 2.529662000   | 1.735649000  | -1.821789000 | 1  | 2.845506000  | 1.627280000  | -1.068420000 |
| 1  | -3.736213000 | 1.334336000  | -0.703304000 | 1  | -3.420446000  | 2.388035000  | 1.198124000  | 1  | -3.580182000 | 2.440863000  | 0.665361000  |
| 1  | -3.870517000 | -0.016857000 | 0.213331000  | 1  | -3.594421000  | 0.919974000  | 1.898321000  | 1  | -4.113908000 | 0.855269000  | 0.789133000  |
| 1  | 3.275613000  | -1.013291000 | 2.618837000  | 1  | 3.358510000   | -2.203589000 | 0.198398000  | 1  | 3.008192000  | -2.463245000 | 0.869612000  |
| 1  | -0.381726000 | -2.573617000 | -0.359532000 | 1  | -1.935408000  | -1.911612000 | -1.119251000 | 1  | 4.344764000  | -0.134150000 | -0.842792000 |
| 1  | 4.512846000  | -0.651438000 | 0.047045000  | 1  | 4.092267000   | 0.026437000  | -1.922238000 | 1  | -4.272110000 | 1.677474000  | -0.635741000 |
| 79 | 5.107218000  | -1.791303000 | -1.926763000 | 79 | -8.061478000  | 1.750647000  | 1.061819000  | 79 | 5.702274000  | -3.077466000 | 1.726403000  |
| 79 | 1.272770000  | -3.888246000 | 0.734671000  | 79 | -10.199490000 | 1.275250000  | -0.663587000 | 79 | 4.384602000  | -4.799838000 | 0.049252000  |
| 79 | 2.881729000  | -1.457198000 | -3.534337000 | 79 | -5.355413000  | 1.069017000  | -0.153616000 | 79 | 7.580222000  | -1.439340000 | 0.591406000  |
| 79 | 2.630847000  | -2.732659000 | -1.148484000 | 79 | -7.554366000  | 0.723989000  | -1.510473000 | 79 | 6.318464000  | -3.213854000 | -1.061776000 |

|                                                        | Cationic |              |              |              | Neutral |              |              |              | Anionic |              |              |              |
|--------------------------------------------------------|----------|--------------|--------------|--------------|---------|--------------|--------------|--------------|---------|--------------|--------------|--------------|
| <b>Au<sub>10</sub>-Ld -<br/>Zwitterionic<br/>(PEH)</b> | 8        | 1.303924153  | -1.417496744 | 2.999292289  | 8       | 1.583945012  | -1.361367510 | 3.100994601  | 8       | 1.607373950  | -1.332539173 | 3.118736896  |
|                                                        | 8        | -2.004704946 | -0.734538242 | -1.520328892 | 8       | -2.270178937 | -0.711583483 | -1.757662287 | 8       | -2.297528456 | -0.694971269 | -1.786843515 |
|                                                        | 8        | 3.134016104  | -1.644138079 | 1.016938667  | 8       | 3.299280954  | -1.543294502 | 1.009899545  | 8       | 3.301106768  | -1.529766296 | 1.008007941  |
|                                                        | 8        | -3.099390400 | -0.644832286 | 0.458648590  | 8       | -3.459036123 | -0.636881163 | 0.155649957  | 8       | -3.462167803 | -0.644184853 | 0.140080844  |
|                                                        | 7        | -3.725632067 | 2.003514486  | -0.166318428 | 7       | -3.629387781 | 2.138635559  | -0.319856318 | 7       | -3.630338450 | 2.137229458  | -0.322301273 |
|                                                        | 6        | -1.342552247 | 1.799113310  | 0.449174491  | 6       | -1.450194634 | 1.541262481  | 0.623420004  | 6       | -1.465425703 | 1.536342671  | 0.647361940  |
|                                                        | 6        | -2.429177231 | 1.376388209  | -0.568325132 | 6       | -2.382724153 | 1.349192206  | -0.580540603 | 6       | -2.378818046 | 1.349008596  | -0.569706652 |
|                                                        | 6        | -0.153116363 | 0.873519748  | 0.540455109  | 6       | -0.212484761 | 0.678352147  | 0.644278601  | 6       | -0.218624322 | 0.686942245  | 0.667496591  |
|                                                        | 6        | 0.039240203  | 0.121159558  | 1.699235591  | 6       | 0.116406033  | 0.004357522  | 1.819849299  | 6       | 0.125864030  | 0.026923223  | 1.846407735  |
|                                                        | 6        | 0.760592198  | 0.738081910  | -0.503068170 | 6       | 0.640066770  | 0.560889904  | -0.452013602 | 6       | 0.623230401  | 0.564347086  | -0.436378009 |
|                                                        | 6        | 1.134807194  | -0.718683414 | 1.832698008  | 6       | 1.283717526  | -0.736586746 | 1.916948200  | 6       | 1.295080555  | -0.712504637 | 1.935943124  |
|                                                        | 6        | -2.549197247 | -0.140509487 | -0.557848849 | 6       | -2.752451594 | -0.124054540 | -0.755873682 | 6       | -2.757563472 | -0.122235771 | -0.768729093 |
|                                                        | 6        | 1.854822971  | -0.112268732 | -0.380655638 | 6       | 1.809616273  | -0.187976568 | -0.362481781 | 6       | 1.794397195  | -0.181774110 | -0.353352381 |
|                                                        | 6        | 2.058088479  | -0.827430863 | 0.791224236  | 6       | 2.145525306  | -0.823991252 | 0.823006595  | 6       | 2.142379817  | -0.810738211 | 0.832069722  |
|                                                        | 1        | -1.814814403 | 1.849010356  | 1.431271356  | 1       | -2.026941413 | 1.345659870  | 1.528487120  | 1       | -2.049534734 | 1.322058275  | 1.543636685  |
|                                                        | 1        | -1.027357188 | 2.808853489  | 0.180749316  | 1       | -1.168226679 | 2.598316562  | 0.640636377  | 1       | -1.195699117 | 2.596400637  | 0.683798991  |
|                                                        | 1        | -2.201144087 | 1.719161201  | -1.571656158 | 1       | -1.946866425 | 1.732719823  | -1.497133334 | 1       | -1.931525466 | 1.740936013  | -1.477311192 |
|                                                        | 1        | -0.660263197 | 0.191432000  | 2.522229567  | 1       | -0.536864466 | 0.054491985  | 2.681176705  | 1       | -0.518647243 | 0.081906040  | 2.714107967  |
|                                                        | 1        | 0.622797542  | 1.296479635  | -1.419748239 | 1       | 0.403755681  | 1.058371777  | -1.383082164 | 1       | 0.376014767  | 1.052434238  | -1.369557843 |
|                                                        | 1        | 2.567745510  | -0.216428522 | -1.189247362 | 1       | 2.473841091  | -0.278217735 | -1.213004734 | 1       | 2.448508856  | -0.280103076 | -1.210445273 |
|                                                        | 1        | -3.613660141 | 3.014865395  | -0.054836343 | 1       | -3.400271269 | 3.107761375  | -0.084295235 | 1       | -3.406562483 | 3.104679503  | -0.075382567 |
|                                                        | 1        | -4.041739471 | 1.613790584  | 0.726814981  | 1       | -4.143718102 | 1.726943584  | 0.464594395  | 1       | -4.155470971 | 1.718631996  | 0.451188836  |
|                                                        | 1        | 2.035619962  | -2.044073497 | 2.889473044  | 1       | 2.293990596  | -2.002988289 | 2.944429470  | 1       | 2.310676162  | -1.979887853 | 2.953069731  |
|                                                        | 1        | 3.619142986  | -1.803357512 | 0.194801342  | 1       | 3.689478716  | -1.783052523 | 0.157005955  | 1       | 3.619615630  | -1.864784145 | 0.156804174  |
|                                                        | 1        | -4.452367016 | 1.836673981  | -0.867031403 | 1       | -4.241540492 | 2.142271818  | -1.139227501 | 1       | -4.230047483 | 2.146382146  | -1.150661650 |
|                                                        | 79       | 5.295850375  | -5.452397320 | 1.140473832  | 79      | 5.322019040  | -5.415793339 | 1.101725673  | 79      | 5.237163114  | -5.435750986 | 1.118218633  |
|                                                        | 79       | 4.220553986  | -4.680298056 | -1.274860654 | 79      | 4.112412017  | -4.591025757 | -1.295048349 | 79      | 4.126348255  | -4.562548929 | -1.329756084 |
|                                                        | 79       | 3.663226656  | -5.628325289 | 3.391250804  | 79      | 3.754333164  | -5.594012912 | 3.339138775  | 79      | 3.747921609  | -5.585322948 | 3.444625158  |
|                                                        | 79       | 2.655555777  | -4.762071618 | 1.011739198  | 79      | 2.639088633  | -4.716255082 | 1.017136073  | 79      | 2.572078139  | -4.837165847 | 0.977984057  |
|                                                        | 79       | 1.591999128  | -3.865814278 | -1.324112284 | 79      | 1.517737725  | -3.740224184 | -1.308282285 | 79      | 1.552379867  | -3.743473392 | -1.422210940 |
|                                                        | 79       | 1.034679585  | -4.997050426 | 3.281652599  | 79      | 1.091865605  | -4.909266383 | 3.321465104  | 79      | 1.120654941  | -4.867426423 | 3.345990080  |
|                                                        | 79       | -0.026595679 | -3.970389855 | 0.938589212  | 79      | -0.006056813 | -3.773918693 | 0.993039002  | 79      | 0.035532317  | -3.840399940 | 0.945165460  |
|                                                        | 79       | -0.623219147 | -2.412114295 | -1.203082129 | 79      | -0.812161334 | -2.421290058 | -1.236432027 | 79      | -0.769560388 | -2.445772601 | -1.342579153 |
|                                                        | 79       | -1.625456890 | -4.315318237 | 3.163750167  | 79      | -1.455789531 | -3.911147525 | 3.288804880  | 79      | -1.383157746 | -3.793090986 | 3.341418866  |
|                                                        | 79       | -2.285373090 | -2.457087108 | 1.374558279  | 79      | -2.365285633 | -2.378878371 | 1.247147569  | 79      | -2.268752489 | -2.402360684 | 1.177003194  |

|                                                       |    |              |              |              |    |              |              |              |    |              |              |              |
|-------------------------------------------------------|----|--------------|--------------|--------------|----|--------------|--------------|--------------|----|--------------|--------------|--------------|
| <b>Au<sub>10</sub>-Ld -<br/>Zwitterionic<br/>(FF)</b> | 8  | 1.929337000  | -2.753188000 | 0.977337000  | 8  | 1.442655000  | -2.804818000 | 1.253009000  | 8  | 0.954520000  | -3.070908000 | 1.006860000  |
|                                                       | 8  | -3.300151000 | 1.427735000  | -1.866232000 | 8  | -3.458527000 | 0.751539000  | -1.581267000 | 8  | -3.152474000 | 0.408794000  | -1.526150000 |
|                                                       | 8  | 2.299991000  | -2.516588000 | -1.697187000 | 8  | 1.847097000  | -2.840223000 | -1.443388000 | 8  | 1.791084000  | -2.824443000 | -1.575310000 |
|                                                       | 8  | -4.106316000 | 0.159138000  | -0.194333000 | 8  | -3.582552000 | -0.182770000 | 0.461702000  | 8  | -3.433377000 | -0.276422000 | 0.599305000  |
|                                                       | 7  | -3.184291000 | 2.420694000  | 1.339902000  | 7  | -3.220709000 | 2.639377000  | 1.188804000  | 7  | -3.210525000 | 2.515465000  | 1.180231000  |
|                                                       | 6  | -1.492838000 | 0.685154000  | 1.069142000  | 6  | -1.169248000 | 1.300424000  | 1.020883000  | 6  | -1.029291000 | 1.385248000  | 0.990617000  |
|                                                       | 6  | -2.354998000 | 1.694009000  | 0.319510000  | 6  | -2.367446000 | 1.846158000  | 0.242916000  | 6  | -2.308019000 | 1.776880000  | 0.237233000  |
|                                                       | 6  | -0.518878000 | -0.123464000 | 0.247601000  | 6  | -0.386651000 | 0.224239000  | 0.307060000  | 6  | -0.237319000 | 0.310734000  | 0.289183000  |
|                                                       | 6  | 0.237174000  | -1.091194000 | 0.920564000  | 6  | 0.144265000  | -0.825427000 | 1.057490000  | 6  | 0.017622000  | -0.889624000 | 0.947121000  |
|                                                       | 6  | -0.332083000 | 0.027260000  | -1.118664000 | 6  | -0.157333000 | 0.242104000  | -1.065097000 | 6  | 0.210324000  | 0.466920000  | -1.021584000 |
|                                                       | 6  | 1.174563000  | -1.870579000 | 0.262738000  | 6  | 0.896102000  | -1.825457000 | 0.463570000  | 6  | 0.705297000  | -1.915101000 | 0.316270000  |
|                                                       | 6  | -3.325326000 | 1.055873000  | -0.694120000 | 6  | -3.218857000 | 0.725031000  | -0.372508000 | 6  | -3.039644000 | 0.541060000  | -0.303954000 |
|                                                       | 6  | 0.585389000  | -0.788456000 | -1.813213000 | 6  | 0.577961000  | -0.773293000 | -1.673732000 | 6  | 0.885974000  | -0.563571000 | -1.663044000 |
|                                                       | 6  | 1.351737000  | -1.731546000 | -1.120152000 | 6  | 1.104526000  | -1.812845000 | -0.918554000 | 6  | 1.125387000  | -1.761392000 | -1.004381000 |
|                                                       | 1  | -2.154117000 | -0.002000000 | 1.602894000  | 1  | -1.529531000 | 0.892900000  | 1.966718000  | 1  | -1.309950000 | 1.023036000  | 1.980603000  |
|                                                       | 1  | -0.933871000 | 1.235542000  | 1.831416000  | 1  | -0.519080000 | 2.146473000  | 1.263354000  | 1  | -0.431476000 | 2.289912000  | 1.126782000  |
|                                                       | 1  | -1.755184000 | 2.446644000  | -0.184162000 | 1  | -2.067057000 | 2.530838000  | -0.544086000 | 1  | -2.098952000 | 2.452671000  | -0.585767000 |
|                                                       | 1  | 0.116631000  | -1.229876000 | 1.987600000  | 1  | -0.023431000 | -0.873777000 | 2.126110000  | 1  | -0.333252000 | -1.047622000 | 1.958871000  |
|                                                       | 1  | -0.860703000 | 0.779807000  | -1.683158000 | 1  | -0.546643000 | 1.041689000  | -1.679755000 | 1  | 0.022759000  | 1.390250000  | -1.554479000 |
|                                                       | 1  | 0.836625000  | -0.565981000 | -2.842562000 | 1  | 0.778260000  | -0.742088000 | -2.736053000 | 1  | 1.224178000  | -0.447737000 | -2.684216000 |
|                                                       | 1  | -2.584281000 | 2.859839000  | 2.042896000  | 1  | -2.663237000 | 3.362873000  | 1.650688000  | 1  | -2.717321000 | 3.305754000  | 1.603750000  |
|                                                       | 1  | -3.813528000 | 1.768150000  | 1.816878000  | 1  | -3.612675000 | 2.029832000  | 1.912485000  | 1  | -3.522705000 | 1.892205000  | 1.930438000  |
|                                                       | 1  | 2.479421000  | -3.272740000 | 0.370969000  | 1  | 1.765738000  | -3.524498000 | 0.688997000  | 1  | 1.228558000  | -3.759246000 | 0.380280000  |
|                                                       | 1  | 2.282457000  | -2.417196000 | -2.661169000 | 1  | 1.743870000  | -2.859142000 | -2.406371000 | 1  | 1.557897000  | -2.886646000 | -2.517257000 |
|                                                       | 1  | -3.752169000 | 3.150228000  | 0.902068000  | 1  | -3.993026000 | 3.095447000  | 0.697079000  | 1  | -4.035988000 | 2.874089000  | 0.695110000  |
|                                                       | 79 | 0.091766000  | -5.158581000 | 1.353701000  | 79 | 0.217856000  | -6.049602000 | 1.012112000  | 79 | -0.188929000 | -6.462206000 | 1.115661000  |
|                                                       | 79 | -1.216574000 | -2.402974000 | -2.390918000 | 79 | -1.590846000 | -2.776113000 | -2.527129000 | 79 | -1.852510000 | -3.071845000 | -2.383135000 |
|                                                       | 79 | -5.300792000 | -6.020499000 | -2.275888000 | 79 | -5.219010000 | -6.358355000 | -2.864481000 | 79 | -5.040300000 | -6.411991000 | -3.086929000 |
|                                                       | 79 | -0.056561000 | -2.932360000 | -4.807901000 | 79 | -0.333571000 | -2.489967000 | -4.876498000 | 79 | -0.442925000 | -2.297525000 | -4.552970000 |
|                                                       | 79 | -3.314573000 | -4.224153000 | -2.067928000 | 79 | -3.734126000 | -4.451761000 | -1.723651000 | 79 | -4.214405000 | -4.579941000 | -1.339349000 |
|                                                       | 79 | -2.779956000 | -6.900349000 | -2.799792000 | 79 | -2.548446000 | -6.615026000 | -3.134084000 | 79 | -2.372829000 | -5.946710000 | -3.115046000 |
|                                                       | 79 | -3.547619000 | -1.827014000 | -0.895100000 | 79 | -3.151773000 | -2.169745000 | -0.342025000 | 79 | -3.389450000 | -2.387481000 | -0.044408000 |
|                                                       | 79 | -1.012779000 | -6.107444000 | -0.867874000 | 79 | -0.308947000 | -6.420574000 | -1.606481000 | 79 | -0.091716000 | -6.227820000 | -1.583934000 |
|                                                       | 79 | -1.703570000 | -3.557751000 | 0.180740000  | 79 | -1.450599000 | -4.292938000 | -0.117117000 | 79 | -1.814627000 | -4.625867000 | 0.027865000  |
|                                                       | 79 | -0.824442000 | -5.067551000 | -3.446466000 | 79 | -0.505522000 | -4.991915000 | -3.901560000 | 79 | 0.073991000  | -4.884753000 | -3.896557000 |

|                                                        |    |              |              |              |    |              |              |              |    |              |              |              |
|--------------------------------------------------------|----|--------------|--------------|--------------|----|--------------|--------------|--------------|----|--------------|--------------|--------------|
| <b>Au<sub>10</sub>-Ld -<br/>Zwitterionic<br/>(CTP)</b> | 8  | -0.412156000 | -3.394031000 | 0.322866000  | 8  | -0.770004000 | -3.636891000 | 0.118290000  | 8  | -1.984206000 | -3.511946000 | 1.157097000  |
|                                                        | 8  | -3.367664000 | 0.578457000  | -0.948263000 | 8  | -2.906163000 | 0.500981000  | -1.367764000 | 8  | -2.354345000 | 0.752708000  | -1.638595000 |
|                                                        | 8  | 0.321939000  | -3.022849000 | -2.274593000 | 8  | 1.017211000  | -3.178280000 | -1.912099000 | 8  | 0.182752000  | -3.913972000 | -0.430646000 |
|                                                        | 8  | -3.712120000 | 0.130457000  | 1.240531000  | 8  | -3.908901000 | 0.304502000  | 0.653498000  | 8  | -3.950205000 | 1.137855000  | -0.083147000 |
|                                                        | 7  | -2.890429000 | 2.709012000  | 1.816489000  | 7  | -2.870031000 | 2.738059000  | 1.356316000  | 7  | -2.514253000 | 3.313062000  | 0.780883000  |
|                                                        | 6  | -0.940720000 | 1.405707000  | 1.028043000  | 6  | -1.005633000 | 1.124038000  | 1.172490000  | 6  | -1.185011000 | 1.303987000  | 1.320490000  |
|                                                        | 6  | -2.332968000 | 1.961592000  | 0.648072000  | 6  | -2.134987000 | 1.842467000  | 0.409587000  | 6  | -1.811208000 | 2.135488000  | 0.182929000  |
|                                                        | 6  | -0.510141000 | 0.260133000  | 0.149581000  | 6  | -0.413101000 | -0.005053000 | 0.372347000  | 6  | -0.763384000 | -0.072062000 | 0.874447000  |
|                                                        | 6  | -0.609724000 | -1.045697000 | 0.626680000  | 6  | -0.827156000 | -1.315569000 | 0.605171000  | 6  | -1.536244000 | -1.177101000 | 1.226252000  |
|                                                        | 6  | -0.096924000 | 0.469260000  | -1.163889000 | 6  | 0.480377000  | 0.245245000  | -0.665213000 | 6  | 0.343689000  | -0.259805000 | 0.050216000  |
|                                                        | 6  | -0.310493000 | -2.126473000 | -0.188264000 | 6  | -0.351968000 | -2.362871000 | -0.169474000 | 6  | -1.209798000 | -2.446929000 | 0.775229000  |
|                                                        | 6  | -3.247127000 | 0.798999000  | 0.280988000  | 6  | -3.090325000 | 0.801261000  | -0.162553000 | 6  | -2.814741000 | 1.281033000  | -0.589679000 |
|                                                        | 6  | 0.189161000  | -0.608871000 | -1.991070000 | 6  | 0.958299000  | -0.797558000 | -1.447882000 | 6  | 0.672747000  | -1.528747000 | -0.410447000 |
|                                                        | 6  | 0.077739000  | -1.904318000 | -1.510090000 | 6  | 0.554058000  | -2.102410000 | -1.201575000 | 6  | -0.096622000 | -2.625014000 | -0.047909000 |
|                                                        | 1  | -0.988125000 | 1.063019000  | 2.062639000  | 1  | -1.419846000 | 0.736288000  | 2.104435000  | 1  | -1.924947000 | 1.211535000  | 2.117365000  |
|                                                        | 1  | -0.232050000 | 2.233420000  | 0.976680000  | 1  | -0.248143000 | 1.869516000  | 1.419847000  | 1  | -0.336513000 | 1.868079000  | 1.712480000  |
|                                                        | 1  | -2.272387000 | 2.655326000  | -0.183942000 | 1  | -1.740985000 | 2.463055000  | -0.388860000 | 1  | -1.051882000 | 2.518586000  | -0.491301000 |
|                                                        | 1  | -0.929915000 | -1.236852000 | 1.642728000  | 1  | -1.538918000 | -1.536875000 | 1.390437000  | 1  | -2.413441000 | -1.058255000 | 1.848728000  |
|                                                        | 1  | -0.019933000 | 1.476128000  | -1.553510000 | 1  | 0.801692000  | 1.258623000  | -0.870022000 | 1  | 0.948236000  | 0.588177000  | -0.245428000 |
|                                                        | 1  | 0.493023000  | -0.454724000 | -3.019352000 | 1  | 1.659788000  | -0.610794000 | -2.252391000 | 1  | 1.532494000  | -1.680710000 | -1.051815000 |
|                                                        | 1  | -2.215466000 | 3.400095000  | 2.154686000  | 1  | -2.217581000 | 3.349731000  | 1.853247000  | 1  | -1.897071000 | 3.818814000  | 1.420890000  |
|                                                        | 1  | -3.098437000 | 2.058805000  | 2.580656000  | 1  | -3.377630000 | 2.173306000  | 2.043902000  | 1  | -3.336688000 | 2.993672000  | 1.301116000  |
|                                                        | 1  | -0.169268000 | -4.038379000 | -0.358280000 | 1  | -0.544075000 | -4.236717000 | -0.613667000 | 1  | -1.744421000 | -4.287230000 | 0.625260000  |
|                                                        | 1  | 0.589691000  | -2.764603000 | -3.168472000 | 1  | 1.554118000  | -2.874502000 | -2.656886000 | 1  | 0.805019000  | -3.915346000 | -1.171200000 |
|                                                        | 1  | -3.753067000 | 3.197966000  | 1.566113000  | 1  | -3.546511000 | 3.324729000  | 0.862231000  | 1  | -2.829713000 | 3.962254000  | 0.056552000  |
|                                                        | 79 | -6.605872000 | -5.588944000 | -3.762189000 | 79 | -5.790605000 | -5.891382000 | -1.981865000 | 79 | -1.510445000 | -6.538414000 | -2.534976000 |
|                                                        | 79 | -4.084098000 | -2.033424000 | 1.031491000  | 79 | -4.944254000 | -1.619070000 | 0.244790000  | 79 | -4.936338000 | -1.018854000 | -0.286971000 |
|                                                        | 79 | -5.555464000 | -5.687376000 | -1.212190000 | 79 | -4.514307000 | -4.281117000 | -0.087808000 | 79 | -2.190464000 | -3.894929000 | -2.598035000 |
|                                                        | 79 | -3.709369000 | -1.410950000 | -1.838996000 | 79 | -6.864908000 | -3.057054000 | -0.922571000 | 79 | -5.254752000 | -3.520741000 | -0.808873000 |
|                                                        | 79 | -2.400588000 | -3.573280000 | -2.766617000 | 79 | -5.051491000 | -3.324549000 | -3.197256000 | 79 | -5.565779000 | -5.186661000 | -3.012780000 |
|                                                        | 79 | -4.299623000 | -4.623862000 | 0.959632000  | 79 | -3.330556000 | -1.472972000 | -2.278273000 | 79 | -2.832612000 | -1.286460000 | -2.417696000 |
|                                                        | 79 | -2.791108000 | -5.817102000 | -0.962426000 | 79 | -2.416156000 | -3.909046000 | -2.972572000 | 79 | -4.136132000 | -2.841239000 | -4.173234000 |
|                                                        | 79 | -1.275022000 | -6.078277000 | -3.251178000 | 79 | -0.739345000 | -6.004548000 | -2.669243000 | 79 | -5.622729000 | -4.460778000 | -5.719278000 |
|                                                        | 79 | -3.934444000 | -5.978175000 | -3.651685000 | 79 | -3.170524000 | -6.226707000 | -1.485290000 | 79 | -3.254892000 | -5.799055000 | -4.603831000 |
|                                                        | 79 | -5.115300000 | -3.392276000 | -2.939636000 | 79 | -7.648581000 | -4.276984000 | -3.253576000 | 79 | -3.783244000 | -5.850154000 | -1.084344000 |
